# Supplementary material for: Genomics of Particulate Matter Exposure Associated Cardiopulmonary Disease: A Narrative Review
Source: MDPI journal article supplement (doi:10.3390/ijerph16224335), 2019-11-07
Supplement: s1 [file s1]

**Table S1.** All Search Results.

| Author(s)                        | Journal                            | Title                                                                                                                                                                                                                      | Year | Volume    | Issue | Database |
|----------------------------------|------------------------------------|----------------------------------------------------------------------------------------------------------------------------------------------------------------------------------------------------------------------------|------|-----------|-------|----------|
| S. K. Ahluwalia and E. C. Matsui | Curr Opin Allergy Clin Immunol     | The indoor environment and its effects on childhood asthma                                                                                                                                                                 | 2011 | 11        | 2     | PubMed   |
| A. H. Ali, et al.                | Mol Carcinog                       | Aberrant DNA methylation of some tumor suppressor genes in lung cancers from workers with chromate exposure                                                                                                                | 2011 | 50        | 2     | PubMed   |
| F. Angelini, et al.              | Oxid Med Cell Longev               | The Impact of Environmental Factors in Influencing Epigenetics Related to Oxidative States in the Cardiovascular System                                                                                                    | 2017 | 2017      |       | PubMed   |
| Y. Bai, et al.                   | J Med Genet                        | Gene editing as a promising approach for respiratory diseases                                                                                                                                                              | 2018 | 55        | 3     | PubMed   |
| B. F. Bessac and S. E. Jordt     | Proc Am Thorac Soc                 | Sensory detection and responses to toxic gases: mechanisms, health effects, and countermeasures                                                                                                                            | 2010 | 7         | 4     | PubMed   |
| M. A. Bind, et al.               | Epidemiology                       | Air pollution and markers of coagulation, inflammation, and endothelial function: associations and epigene-environment interactions in an elderly cohort                                                                   | 2012 | 23        | 2     | PubMed   |
| A. K. Boehme, et al.             | Circ Res                           | Stroke Risk Factors, Genetics, and Prevention                                                                                                                                                                              | 2017 | 120       | 3     | PubMed   |
| C. V. Breton, et al.             | Environ Health Perspect            | Prenatal Air Pollution Exposures, DNA Methyl Transferase Genotypes, and Associations with Newborn LINE1 and Alu Methylation and Childhood Blood Pressure and Carotid Intima-Media Thickness in the Children's Health Study | 2016 | 124       | 12    | PubMed   |
| H. Cai and C. Wang               | Chest                              | Surviving With Smog and Smoke: Precision Interventions?                                                                                                                                                                    | 2017 | 152       | 5     | PubMed   |
| C. Canova, et al.                | Epidemiology                       | PM10-induced hospital admissions for asthma and chronic obstructive pulmonary disease: the modifying effect of individual characteristics                                                                                  | 2012 | 23        | 4     | PubMed   |
| D. Cao, et al.                   | Am J Respir Cell Mol Biol          | COX-2 expression induced by diesel particles involves chromatin modification and degradation of HDAC1                                                                                                                      | 2007 | 37        | 2     | PubMed   |
| C. Carlsten and E. Melen         | Curr Opin Allergy Clin Immunol     | Air pollution, genetics, and allergy: an update                                                                                                                                                                            | 2012 | 12        | 5     | PubMed   |
| M. Cresci, et al.                | Am J Cardiol                       | Maternal and paternal environmental risk factors, metabolizing GSTM1 and GSTT1 polymorphisms, and congenital heart disease                                                                                                 | 2011 | 108       | 11    | PubMed   |
| D. Cyranoski, et al.             | Nature                             | Science stars of East Asia                                                                                                                                                                                                 | 2018 | 558       | 7711  | PubMed   |
| G. D'Amato, et al.               | Monaldi Arch Chest Dis             | Environment and development of respiratory allergy: I. Outdoors                                                                                                                                                            | 1994 | 49        | 5     | PubMed   |
| N. Dey, et al.                   | J Biosci                           | Activated charcoal filter effectively reduces p-benzosemiquinone from the mainstream cigarette smoke and prevents emphysema                                                                                                | 2010 | 35        | 2     | PubMed   |
| N. Ding, et al.                  | PLoS One                           | Lead-Related Genetic Loci, Cumulative Lead Exposure and Incident Coronary Heart Disease: The Normative Aging Study                                                                                                         | 2016 | 11        | 9     | PubMed   |
| K. Donaldson and C. A. Poland    | Swiss Med Wkly                     | Inhaled nanoparticles and lung cancer - what we can learn from conventional particle toxicology                                                                                                                            | 2012 | 142       |       | PubMed   |
| R. M. Effros and H. Nagaraj      | Curr Opin Pulm Med                 | Asthma: new developments concerning immune mechanisms, diagnosis and treatment                                                                                                                                             | 2007 | 13        | 1     | PubMed   |
| I. C. Eze, et al.                | Int J Environ Res Public Health    | Exposure to Night-Time Traffic Noise, Melatonin-Regulating Gene Variants and Change in Glycemia in Adults                                                                                                                  | 2017 | 14        | 12    | PubMed   |
| I. C. Eze, et al.                | Environ Int                        | Air pollution and diabetes association: Modification by type 2 diabetes genetic risk score                                                                                                                                 | 2016 | 94        |       | PubMed   |
| M. Fathy, et al.                 | Mol Diagn Ther                     | Association between environmental tobacco smoke exposure and lung cancer susceptibility: modification by antioxidant enzyme genetic polymorphisms                                                                          | 2014 | 18        | 1     | PubMed   |
| J. M. Gaffin and W. Phipatanakul | Curr Opin Allergy Clin Immunol     | The role of indoor allergens in the development of asthma                                                                                                                                                                  | 2009 | 9         | 2     | PubMed   |
| L. Gan, et al.                   | Int J Chron Obstruct Pulmon Dis    | Curcumin modulates the effect of histone modification on the expression of chemokines by type II alveolar epithelial cells in a rat COPD model                                                                             | 2016 | 11        |       | PubMed   |
| S. E. Gomez-Mejiba, et al.       | Mutat Res                          | Inhalation of environmental stressors & chronic inflammation: autoimmunity and neurodegeneration                                                                                                                           | 2009 | 674       | 2-Jan | PubMed   |
| L. M. Graham                     | Paediatr Respir Rev                | All I need is the air that I breath: outdoor air quality and asthma                                                                                                                                                        | 2004 | 5 Suppl A |       | PubMed   |
| D. J. Gregory, et al.            | Am J Physiol Lung Cell Mol Physiol | Transgenerational transmission of asthma risk after exposure to environmental particles during pregnancy                                                                                                                   | 2017 | 313       | 2     | PubMed   |
| I. Gupta, et al.                 | Proc Natl Acad Sci U S A           | Ascorbate attenuates pulmonary emphysema by inhibiting tobacco smoke and Rtp801-triggered lung protein modification and proteolysis                                                                                        | 2016 | 113       | 29    | PubMed   |
| N. Hakansson, et al.             | Am J Epidemiol                     | Occupational exposure to extremely low frequency magnetic fields and mortality from cardiovascular disease                                                                                                                 | 2003 | 158       | 6     | PubMed   |
| S. Han, et al.                   | Mol Biol Rep                       | Resveratrol affects histone 3 lysine 27 methylation of vessels and blood biomarkers in DOCA salt-induced hypertension                                                                                                      | 2015 | 42        | 1     | PubMed   |
| A. L. Hansell, et al.            | Environ Health                     | Childhood fish oil supplementation modifies associations between traffic related air pollution and allergic sensitisation                                                                                                  | 2018 | 17        | 1     | PubMed   |
| A. J. Henderson, et al.          | Thorax                             | Maternal Nrf2 and glutathione-S-transferase polymorphisms do not modify associations of prenatal tobacco smoke exposure with asthma and lung function in school-aged children                                              | 2010 | 65        | 10    | PubMed   |
| B. Hennig, et al.                | Nutr Metab Cardiovasc Dis          | Environmental toxicity, nutrition, and gene interactions in the development of atherosclerosis                                                                                                                             | 2007 | 17        | 2     | PubMed   |
| M. Hodjat, et al.                | Arch Toxicol                       | Environmental toxicants, incidence of degenerative diseases, and therapies from the epigenetic point of view                                                                                                               | 2017 | 91        | 7     | PubMed   |
| X. Huang, et al.                 | Bull Cancer                        | Methylation analysis for multiple gene promoters in non-small cell lung cancers in high indoor air pollution region in China                                                                                               | 2018 | 105       | 9     | PubMed   |
| S. E. Humphries, et al.          | Arterioscler Thromb Vasc Biol      | Genetic testing for cardiovascular disease susceptibility: a useful clinical management tool or possible misinformation?                                                                                                   | 2004 | 24        | 4     | PubMed   |
| B. F. Hwang, et al.              | PLoS One                           | Fine particle, ozone exposure, and asthma/wheezing: effect modification by glutathione S-transferase P1 polymorphisms                                                                                                      | 2013 | 8         | 1     | PubMed   |

|                                |                                  |                                                                                                                                                                                                                       |      |            |       |        |
|--------------------------------|----------------------------------|-----------------------------------------------------------------------------------------------------------------------------------------------------------------------------------------------------------------------|------|------------|-------|--------|
| J. J. Jaakkola, et al.         | Environ Health Perspect          | Environmental tobacco smoke, parental atopy, and childhood asthma                                                                                                                                                     | 2001 | 109        | 6     | PubMed |
| D. Jaffuel, et al.             | Rev Mal Respir                   | [The epidemiology and genetics of asthma. I. Descriptive epidemiology and analysis of environmental factors]                                                                                                          | 1996 | 13         | 5     | PubMed |
| A. Jeong, et al.               | Int J Environ Res Public Health  | DNA Methylation in Inflammatory Pathways Modifies the Association between BMI and Adult-Onset Non-Atopic Asthma                                                                                                       | 2019 | 16         | 4     | PubMed |
| M. A. Jhun, et al.             | Environ Health                   | Effect modification by vitamin D receptor genetic polymorphisms in the association between cumulative lead exposure and pulse pressure: a longitudinal study                                                          | 2015 | 14         |       | PubMed |
| L. G. Johnson, et al.          | J Virol                          | Effect of host modification and age on airway epithelial gene transfer mediated by a murine leukemia virus-derived vector                                                                                             | 1998 | 72         | 11    | PubMed |
| M. Kabesch                     | Curr Opin Allergy Clin Immunol   | Epigenetics in asthma and allergy                                                                                                                                                                                     | 2014 | 14         | 1     | PubMed |
| C. Kiyohara, et al.            | Int J Cancer                     | Risk modification by CYP1A1 and GSTM1 polymorphisms in the association of environmental tobacco smoke and lung cancer: a case-control study in Japanese nonsmoking women                                              | 2003 | 107        | 1     | PubMed |
| E. C. Klingbeil, et al.        | Immunol Res                      | Polycyclic aromatic hydrocarbons, tobacco smoke, and epigenetic remodeling in asthma                                                                                                                                  | 2014 | 58         | 3-Feb | PubMed |
| B. Kljaic-Bukvic, et al.       | Pediatr Allergy Immunol          | Genetic variants in endotoxin signalling pathway, domestic endotoxin exposure and asthma exacerbations                                                                                                                | 2014 | 25         | 6     | PubMed |
| Y. A. Ko, et al.               | Epidemiology                     | Classification and Clustering Methods for Multiple Environmental Factors in Gene-Environment Interaction: Application to the Multi-Ethnic Study of Atherosclerosis                                                    | 2016 | 27         | 6     | PubMed |
| J. K. Kresovich, et al.        | Biomarkers                       | Histone 3 modifications and blood pressure in the Beijing Truck Driver Air Pollution Study                                                                                                                            | 2017 | 22         | 6     | PubMed |
| C. C. Kuo, et al.              | Curr Diab Rep                    | Environmental chemicals and type 2 diabetes: an updated systematic review of the epidemiologic evidence                                                                                                               | 2013 | 13         | 6     | PubMed |
| C. H. Kuo, et al.              | Asia Pac Allergy                 | Epigenetic regulation in allergic diseases and related studies                                                                                                                                                        | 2014 | 4          | 1     | PubMed |
| L. I. Landau                   | Paediatr Respir Rev              | Paediatric basis of adult lung disease                                                                                                                                                                                | 2006 | 7 Suppl 1  |       | PubMed |
| C. Lau, et al.                 | Obstet Gynecol                   | Fetal programming of adult disease: implications for prenatal care                                                                                                                                                    | 2011 | 117        | 4     | PubMed |
| S. Y. Lee, et al.              | BMC Pulm Med                     | Modification of additive effect between vitamins and ETS on childhood asthma risk according to GSTP1 polymorphism: a cross -sectional study                                                                           | 2015 | 15         |       | PubMed |
| S. Leng, et al.                | Carcinogenesis                   | Genetic variation in SIRT1 affects susceptibility of lung squamous cell carcinomas in former uranium miners from the Colorado plateau                                                                                 | 2013 | 34         | 5     | PubMed |
| J. Li, et al.                  | Clin Respir J                    | Particulate matter-induced epigenetic changes and lung cancer                                                                                                                                                         | 2017 | 11         | 5     | PubMed |
| X. Li, et al.                  | Sci Rep                          | Modification of the association between maternal smoke exposure and congenital heart defects by polymorphisms in glutathione S-transferase genes                                                                      | 2015 | 5          |       | PubMed |
| W. Y. Lim and A. Seow          | Respirology                      | Biomass fuels and lung cancer                                                                                                                                                                                         | 2012 | 17         | 1     | PubMed |
| M. Littorin, et al.            | Int Arch Occup Environ Health    | Influence of polymorphic metabolic enzymes on biotransformation and effects of diphenylmethane diisocyanate                                                                                                           | 2008 | 81         | 4     | PubMed |
| A. H. Liu, et al.              | J Allergy Clin Immunol           | Advances in asthma 2015: Across the lifespan                                                                                                                                                                          | 2016 | 138        | 2     | PubMed |
| P. Ljungman, et al.            | Environ Health Perspect          | Modification of the interleukin-6 response to air pollution by interleukin-6 and fibrinogen polymorphisms                                                                                                             | 2009 | 117        | 9     | PubMed |
| J. C. Luo, et al.              | J Occup Environ Med              | Decreased lung function associated with occupational exposure to epichlorohydrin and the modification effects of glutathione s-transferase polymorphisms                                                              | 2004 | 46         | 3     | PubMed |
| M. E. Lustberg, et al.         | J Occup Environ Med              | The G(894)-T(894) polymorphism in the gene for endothelial nitric oxide synthase and blood pressure in lead-exposed workers from Korea                                                                                | 2004 | 46         | 6     | PubMed |
| D. P. Miller, et al.           | Int J Cancer                     | Association between self-reported environmental tobacco smoke exposure and lung cancer: modification by GSTP1 polymorphism                                                                                            | 2003 | 104        | 6     | PubMed |
| A. Misra, et al.               | J Nutr                           | Black tea prevents cigarette smoke-induced oxidative damage of proteins in guinea pigs                                                                                                                                | 2003 | 133        | 8     | PubMed |
| I. Mordukhovich, et al.        | Epidemiology                     | Association Between Particulate Air Pollution and QT Interval Duration in an Elderly Cohort                                                                                                                           | 2016 | 27         | 2     | PubMed |
| I. Mordukhovich, et al.        | Environ Health Perspect          | Black carbon exposure, oxidative stress genes, and blood pressure in a repeated-measures study                                                                                                                        | 2009 | 117        | 11    | PubMed |
| K. Nakachi, et al.             | Cancer Res                       | Polymorphisms of the CYP1A1 and glutathione S-transferase genes associated with susceptibility to lung cancer in relation to cigarette dose in a Japanese population                                                  | 1993 | 53         | 13    | PubMed |
| A. M. Neophytou, et al.        | Am J Respir Crit Care Med        | Air Pollution and Lung Function in Minority Youth with Asthma in the GALA II (Genes-Environments and Admixture in Latino Americans) and SAGE II (Study of African Americans, Asthma, Genes, and Environments) Studies | 2016 | 193        | 11    | PubMed |
| J. M. Ordovas and C. E. Smith  | Nat Rev Cardiol                  | Epigenetics and cardiovascular disease                                                                                                                                                                                | 2010 | 7          | 9     | PubMed |
| B. Ouyang, et al.              | Toxicol Sci                      | Interferon-gamma promoter is hypermethylated in blood DNA from workers with confirmed diisocyanate asthma                                                                                                             | 2013 | 133        | 2     | PubMed |
| S. E. Ozanne and M. Constancia | Nat Clin Pract Endocrinol Metab  | Mechanisms of disease: the developmental origins of disease and the role of the epigenotype                                                                                                                           | 2007 | 3          | 7     | PubMed |
| A. Peters, et al.              | Inhal Toxicol                    | Air pollution and inflammatory response in myocardial infarction survivors: gene-environment interactions in a high-risk group                                                                                        | 2007 | 19 Suppl 1 |       | PubMed |
| P. Pisani, et al.              | Cancer Epidemiol Biomarkers Prev | GSTM1 and CYP1A1 polymorphisms, tobacco, air pollution, and lung cancer: a study in rural Thailand                                                                                                                    | 2006 | 15         | 4     | PubMed |
| S. M. Reamon-Buettner, et al.  | Mutat Res                        | The next innovation cycle in toxicogenomics: environmental epigenetics                                                                                                                                                | 2008 | 659        | 2-Jan | PubMed |

|                            |                                |                                                                                                                                                                       |      |     |     |        |
|----------------------------|--------------------------------|-----------------------------------------------------------------------------------------------------------------------------------------------------------------------|------|-----|-----|--------|
| D. Q. Rich, et al.         | Res Rep Health Eff Inst        | Ambient and Controlled Particle Exposures as Triggers for Acute ECG Changes                                                                                           | 2016 |     | 186 | PubMed |
| G. Rico-Rosillo, et al.    | Rev Alerg Mex                  | [Epigenetics, environment and asthma]                                                                                                                                 | 2014 | 61  | 2   | PubMed |
| A. Safwat, et al.          | Int J Radiat Oncol Biol Phys   | Deterministic rather than stochastic factors explain most of the variation in the expression of skin telangiectasia after radiotherapy                                | 2002 | 52  | 1   | PubMed |
| M. T. Salam, et al.        | Epigenomics                    | Epigenetics and childhood asthma: current evidence and future research directions                                                                                     | 2012 | 4   | 4   | PubMed |
| A. Scesnaite, et al.       | Mutagenesis                    | Similar DNA methylation pattern in lung tumours from smokers and never-smokers with second-hand tobacco smoke exposure                                                | 2012 | 27  | 4   | PubMed |
| G. Schmolz                 | Offentl Gesundheitswes         | [The carcinogenic effect of asbestos]                                                                                                                                 | 1989 | 51  | 10  | PubMed |
| W. Schnass, et al.         | Int J Hyg Environ Health       | Traffic-related air pollution and eczema in the elderly: Findings from the SALIA cohort                                                                               | 2018 | 221 | 6   | PubMed |
| M. Scott, et al.           | Thorax                         | Multifaceted allergen avoidance during infancy reduces asthma during childhood with the effect persisting until age 18 years                                          | 2012 | 67  | 12  | PubMed |
| H. Skuladottir, et al.     | Lung Cancer                    | Polymorphisms in genes involved in xenobiotic metabolism and lung cancer risk under the age of 60 years. A pooled study of lung cancer patients in Denmark and Norway | 2005 | 48  | 2   | PubMed |
| P. D. Sly                  | Curr Opin Allergy Clin Immunol | The early origins of asthma: who is really at risk?                                                                                                                   | 2011 | 11  | 1   | PubMed |
| H. K. Somineni, et al.     | J Allergy Clin Immunol         | Ten-eleven translocation 1 (TET1) methylation is associated with childhood asthma and traffic-related air pollution                                                   | 2016 | 137 | 3   | PubMed |
| A. Sood, et al.            | Am J Respir Crit Care Med      | Wood smoke exposure and gene promoter methylation are associated with increased risk for COPD in smokers                                                              | 2010 | 182 | 9   | PubMed |
| D. I. Suh, et al.          | Allergy Asthma Immunol Res     | Prenatal Maternal Distress and Allergic Diseases in Offspring: Review of Evidence and Possible Pathways                                                               | 2017 | 9   | 3   | PubMed |
| I. K. Sundar, et al.       | J Proteome Res                 | Cigarette smoke induces distinct histone modifications in lung cells: implications for the pathogenesis of COPD and lung cancer                                       | 2014 | 13  | 2   | PubMed |
| I. K. Sundar and I. Rahman | Front Pharmacol                | Vitamin d and susceptibility of chronic lung diseases: role of epigenetics                                                                                            | 2011 | 2   |     | PubMed |
| M. Talikka, et al.         | Crit Rev Toxicol               | Genomic impact of cigarette smoke, with application to three smoking-related diseases                                                                                 | 2012 | 42  | 10  | PubMed |
| L. K. Williams, et al.     | Ann Allergy Asthma Immunol     | Gene-environment interactions between CD14 C-260T and endotoxin exposure on Foxp3+ and Foxp3- CD4+ lymphocyte numbers and total serum IgE levels in early childhood   | 2008 | 100 | 2   | PubMed |
| S. S. Wise, et al.         | Rev Environ Health             | Hexavalent chromium-induced DNA damage and repair mechanisms                                                                                                          | 2008 | 23  | 1   | PubMed |
| S. Xu, et al.              | Int J Cardiol                  | Targeting hydrogen sulfide as a promising therapeutic strategy for atherosclerosis                                                                                    | 2014 | 172 | 2   | PubMed |
| H. Zhang, et al.           | Occup Environ Med              | TNF polymorphisms modify endotoxin exposure-associated longitudinal lung function decline                                                                             | 2007 | 64  | 6   | PubMed |
| H. Zheng, et al.           | PLoS One                       | Genome-wide alteration in DNA hydroxymethylation in the sperm from bisphenol A-exposed men                                                                            | 2017 | 12  | 6   | PubMed |
